# Supplementary material for: Safety and Efficacy of the Bordetella bronchiseptica Vaccine Combined with a Vegetable Oil Adjuvant and Multi-Omics Analysis of Its Potential Role in the Protective Response of Rabbits
Source: Pharmaceutics. 2022 Jul 8;14(7):1434. doi: 10.3390/pharmaceutics14071434 (PMC9317422; doi:10.3390/pharmaceutics14071434)
Supplement: Supplementary file 1 [file pharmaceutics-14-01434-s001.zip]

Archive with 5 entries (5 files):
- supplementary figures.pdf
- Table S1. Sequences of primers for quantitative RT-qPCR.xlsx
- Table S2. Transcriptome GO enrichment.xlsx
- Table S3. Proteome GO enrichment.xlsx
- Table S4. Proteome&Transcriptome KEGG pathway enrichment.xlsx
