# Supplementary material for: Safety and Efficacy of the Bordetella bronchiseptica Vaccine Combined with a Vegetable Oil Adjuvant and Multi-Omics Analysis of Its Potential Role in the Protective Response of Rabbits
Source: Pharmaceutics. 2022 Jul 8;14(7):1434. doi: 10.3390/pharmaceutics14071434 (PMC9317422; doi:10.3390/pharmaceutics14071434)
Supplement: Supplementary file 1 [file pharmaceutics-14-01434-s001.zip › Table S1. Sequences of primers for quantitative RT-qPCR.xlsx]

## Sheet: Sheet1
Table S1. Sequences of primers for quantitative RT-qPCR.
Gene	Primer sequence
1. CNR1	Forward: 5-GGCACATTGCATTCTAGCGG-3
	Reverse: 5-GAACAGAAACACGTTGGGGC-3
2. SLC26A7	Forward: 5-TCTGGAGCAAGGTGCATAGC-3
	Reverse: 5-ACACTGGGTGCACAGATGAG-3
3. ANKRD1	Forward: 5-GCCGACCTCACCATCAAGAA-3
	Reverse: 5-GCCATGCCTTCAAAATGCCA-3
4. MZB1	Forward: 5-CATTCAAGCACTCGCACACC-3
	Reverse: 5-TCTCCGGGATGAAGTTTGGC-3
5. ADAMTS13	Forward: 5-GCGACGAGGAGATCCTAACG-3
	Reverse: 5-CTCGCAGGTCAATGGTTCCT-3
6. KY	Forward: 5-GCCCCAGGTCATCACTTCCT-3
	Reverse: 5-GTCTGGTAGCCGAAGCCTTT-3
7. STYXL1	Forward: 5-TTGTGTGAACCAACCGAGCTCT-3
	Reverse: 5-CGTGGCTTTCGTCATACTCCC-3
8. ART4	Forward: 5-AGGGAAGTCTGGAGAACCCA-3
	Reverse: 5-AACCAAGATGGCCACAGCAT-3
9. ST18	Forward: 5-CAAGGCTGCACCCCTAACTT-3
	Reverse: 5-ATTACAGCCTGGCAAGGGAC-3
10. SUCNR1	Forward: 5-AAACAAATGTGGGGTGGGGT-3
	Reverse: 5-GGGCCAGATTGAAGAGTGCT-3
11. TUBE1	Forward: 5-TAGTCTCTACCTCGCCTGT-3
	Reverse: 5-CGTCCAGTCTGTCATACTCC-3
12. CILP	Forward: 5-TCAACCCAGGTCAAGATGCC-3
	Reverse: 5-CATCCCGGATCCCATACAGC-3
13. GAPDH	Forward: 5-TGTTTGTGATGGGCGTGAA-3
	Reverse: 5-CCTCCACAATGCCGAAGT-3
