# Supplementary material for: Safety and Efficacy of the Bordetella bronchiseptica Vaccine Combined with a Vegetable Oil Adjuvant and Multi-Omics Analysis of Its Potential Role in the Protective Response of Rabbits
Source: Pharmaceutics. 2022 Jul 8;14(7):1434. doi: 10.3390/pharmaceutics14071434 (PMC9317422; doi:10.3390/pharmaceutics14071434)
Supplement: Supplementary file 1 [file pharmaceutics-14-01434-s001.zip › Table S2. Transcriptome GO enrichment.xlsx]

## Sheet:  RNA-seq GO enrichment
Table S2. Transcriptome GO enrichment.
Contrasts	ID	Term_type	Description	P-value
E515-Bb vs. Bb	GO:0051301	Biological Process	cell division	5.52e-06
	GO:0006270	Biological Process	DNA replication initiation	1.6e-05
	GO:0000723	Biological Process	telomere maintenance	1.64e-05
	GO:0000082	Biological Process	G1/S transition of mitotic cell cycle	6.04e-05
	GO:0005524	Molecular Function	ATP binding	6.55e-05
	GO:0010389	Biological Process	regulation of G2/M transition of mitotic cell cycle	8.24e-05
	GO:0034988	Molecular Function	Fc-gamma receptor I complex binding	8.87e-05
	GO:0071560	Biological Process	cellular response to transforming growth factor beta stimulus	0.000114063
	GO:0006955	Biological Process	immune response	0.000247355
	GO:0006955	Biological Process	immune response	3.63e-05
Alum-Bb vs. Bb	GO:0043312	Biological Process	neutrophil degranulation	0.000434323
	GO:0008285	Biological Process	negative regulation of cell population proliferation	0.00117183
	GO:0032651	Biological Process	regulation of interleukin-1 beta production	0.00122369
	GO:0002292	Biological Process	T cell differentiation involved in immune response	0.00122369
	GO:0070098	Biological Process	chemokine-mediated signaling pathway	0.00139453
	GO:0071347	Biological Process	cellular response to interleukin-1	0.00140104
E515-Bb vs.Alum-Bb	GO:0045582	Biological Process	positive regulation of T cell differentiation	1.29e-06
	GO:0051301	Biological Process	cell division	1.75e-06
	GO:0031100	Biological Process	animal organ regeneration	6.39e-06
	GO:0071353	Biological Process	cellular response to interleukin-4	2.14e-05
	GO:2000353	Biological Process	positive regulation of endothelial cell apoptotic process	2.9e-05
