# Supplementary material for: Safety and Efficacy of the Bordetella bronchiseptica Vaccine Combined with a Vegetable Oil Adjuvant and Multi-Omics Analysis of Its Potential Role in the Protective Response of Rabbits
Source: Pharmaceutics. 2022 Jul 8;14(7):1434. doi: 10.3390/pharmaceutics14071434 (PMC9317422; doi:10.3390/pharmaceutics14071434)
Supplement: Supplementary file 1 [file pharmaceutics-14-01434-s001.zip › Table S3. Proteome GO enrichment.xlsx]

## Sheet: 4D label free GO enrichment
Table S3. Proteome GO enrichment.
Contrasts	ID	Term_type	Description	P-value
E515-Bb vs. Bb	GO:0004888	Molecular Function	transmembrane signaling receptor activity	0.0007376
	GO:0032395	Molecular Function	MHC class II receptor activity	0.00709464
	GO:0002694	Biological Process	regulation of leukocyte activation	0.00104814
	GO:1903317	Biological Process	regulation of protein maturation	0.00255495
	GO:0051249	Biological Process	regulation of lymphocyte activation	0.00261617
	GO:0050866	Biological Process	negative regulation of cell activation	0.00588449
	GO:0002253	Biological Process	activation of immune response	0.00796393
	GO:0043277	Biological Process	apoptotic cell clearance	0.00931699
	GO:0072538	Biological Process	T-helper 17 type immune response	0.0124923
Alum-Bb vs. Bb	GO:0016209	Molecular Function	antioxidant activity	0.000871502
	GO:0045236	Molecular Function	CXCR chemokine receptor binding	0.00706991
	GO:0043277	Biological Process	apoptotic cell clearance	0.000804788
	GO:0098869	Biological Process	cellular oxidant detoxification	0.00147502
	GO:1990748	Biological Process	cellular detoxification	0.00300137
	GO:2000535	Biological Process	regulation of entry of bacterium into host cell	0.00394102
	GO:0050866	Biological Process	negative regulation of cell activation	0.00749729
	GO:0070664	Biological Process	negative regulation of leukocyte proliferation	0.0107042
	GO:0002695	Biological Process	negative regulation of leukocyte activation	0.0109951
E515-Bb vs. Alum-Bb	GO:0015459	Molecular Function	potassium channel regulator activity	0.000890165
	GO:0004033	Molecular Function	aldo-keto reductase (NADP) activity	0.00160389
	GO:0050661	Molecular Function	NADP binding	0.00457604
	GO:0048037	Molecular Function	cofactor binding	0.00532013
	GO:0099106	Molecular Function	ion channel regulator activity	0.00639375
	GO:0016247	Molecular Function	channel regulator activity	0.00940213
	GO:0050662	Molecular Function	coenzyme binding	0.0131666
	GO:0044325	Molecular Function	ion channel binding	0.0163387
	GO:0032410	Biological Process	negative regulation of transporter activity	0.0077982
	GO:0034763	Biological Process	negative regulation of transmembrane transport	0.0244608
