# Supplementary material for: Safety and Efficacy of the Bordetella bronchiseptica Vaccine Combined with a Vegetable Oil Adjuvant and Multi-Omics Analysis of Its Potential Role in the Protective Response of Rabbits
Source: Pharmaceutics. 2022 Jul 8;14(7):1434. doi: 10.3390/pharmaceutics14071434 (PMC9317422; doi:10.3390/pharmaceutics14071434)
Supplement: Supplementary file 1 [file pharmaceutics-14-01434-s001.zip › Table S4. Proteome&Transcriptome KEGG pathway enrichment.xlsx]

## Sheet: E515-Bb vs. Bb
Table S4. Proteome&Transcriptme KEGG pathway enrichment.
Contrasts	Terms	Fold enrichment	p value	Related proteins
	(Proteome-Transcriptome)
E515-Bb vs. Bb	up-up pathway
	map04610 Complement and coagulation cascades	13.12	0.00979858	G1SR31 G1T8T5
	map04514 Cell adhesion molecules (CAMs)	6.03	0.0420235	U3KLX1 A0A5F9DFM7
	down-down pathway
	map03410 Base excision repair	22.74	0.00345773	G1T236 G1TNB4
	map03030 DNA replication	22.44	0.00354991	G1T236 G1SM33
	map04141 Protein processing in endoplasmic reticulum	6.16	0.0121492	G1U7C5 A0A5F9CVT3 G1TIZ5
	map04115 p53 signaling pathway	10.52	0.0153108	G1SIH0 G1T0K2
	map04110 Cell cycle	5.86	0.0451281	G1SIH0 G1T0K2
	down-unchange pathway
	map03010 Ribosome	9.82	3.11484e-12	G1SGR6 G1SQH0 G1SZ12 G1SPF6 G1U7M4 G1TRM4 G1SPI6 G1TIB4 A0A5F9D391 G1SIT5 G1U7L1 G1TN80 G1TQC3 G1SFZ2 A0A5F9D5B2 G1TL06
	map03022 Basal transcription factors	10.82	0.00269562	G1T9Z3 G1TH00 G1T724
	up-unchange pathway
	map04666 Fc gamma R-mediated phagocytosis	4.78	0.00385837	G1SJM8 G1T7T8 G1SS57 G1SJX0 G1TVC1
	map04145 Phagosome	3.79	0.00486055	G1SJM8 G1T7R4 A0A5F9DKB2 G1SV24 G1SRY0 G1SKF1
	map04210 Apoptosis	4.22	0.0148168	G1SV24 A0A5F9C3P7 G1TRH3 G1TVC1
	map04621 NOD-like receptor signaling pathway	3.15	0.0378552	G1TAI7 G1SKC9 G1U846 A0A5F9C3P7
	unchange-down pathway
	map04141 Protein processing in endoplasmic reticulum	5.11	1.70275e-12	G1U2W0 G1T4H3 G1SCT0 G1T3Z2 A0A5F9DT69 G1T534 U3KMW5 G1T974 A0A5F9CRT4 G1U7L4 A0A0G2JH20 G1TBC1 U3KMG3 A0A5F9C6Y7 G1SLD5 G1TBR5 G1U5L3 G1SR63 G1SZT8 G1SGQ0 G1SW75 A0A5F9CYV9 A0A5F9DGC4 G1SCQ0 G1SFV1 A0A5F9DIS8 G1SQZ2 G1SNL4 G1TLK0
	map00240 Pyrimidine metabolism	5.88	8.18451e-06	A0A5F9CL34 G1SN21 G1SPQ7 A0A5F9C8K6 G1SQ07 U3KNZ4 G1SV65 G1U7U3 A0A5F9C843 G1SVL8
	map03060 Protein export	8.88	1.30636e-05	G1TBR5 A0A5F9D6C3 G1STG2 G1U7L4 U3KPB2 G1T0F6 G1SWR7
	map03030 DNA replication	6.75	7.93967e-05	G1SJE3 A0A5F9CI26 G1SZQ1 G1TB40 G1T8E8 G1SD05 G1SLF6
	map04512 ECM-receptor interaction	3.54	0.000309849	G1U9R7 A0A5F9D0T9 G1SJE1 G1TN89 A0A5F9CEG8 A0A5F9CTL5 A0A5F9CI63 A0A5F9CNP8 A0A5F9DVM4 A0A5F9DRG5 A0A5F9CXB0
	map04210 Apoptosis	2.04	0.0339016	G1U7V8 G1SS26 U3KNJ6 G1SRD0 Q9MYW4 G1ST69 G1TR82 U3KMG3 G1SQZ2
	map04215 Apoptosis	3.21	0.0362455	G1SRD0 Q9MYW4 U3KMG3 G1SQZ2
	unchange-up pathway
	map04514 Cell adhesion molecules (CAMs)	3.02	0.00184353	G1SHN5 A0A5F9DR37 A0A5F9DEG4 G1SKP7 Q30847 A0A5F9CDS8 A0A5F9DUW7 A0A5F9CGV0 G1SUI3 A0A5F9CQJ1
	map04152 AMPK signaling pathway	2.86	0.00710714	G1T5V3 U3KMP1 U3KMB2 P63150 G1T8S6 G1SMR9 G1SJX1 A0A5F9DM35
	map04658 Th1 and Th2 cell differentiation	2.83	0.0199001	G1SHN5 A0A5F9DUW7 A0A5F9CDD4 A0A5F9DEG4 A0A5F9CQJ1 Q30847
	map04612 Antigen processing and presentation	2.79	0.0340999	G1SHN5 A0A5F9DUW7 A0A5F9DEG4 A0A5F9CQJ1 Q30847
	map04659 Th17 cell differentiation	2.46	0.0358659	G1SHN5 A0A5F9DUW7 A0A5F9DEG4 G1TAL4 A0A5F9CQJ1 Q30847

## Sheet: Alum-Bb vs. Bb
Contrasts	Terms	Fold enrichment	p value	Related proteins
	(Proteome-Transcriptome)
Alum-Bb vs. Bb	down-unchange pathway
	map00190 Oxidative phosphorylation	4.71	0.00419563	G1TX53 U3KM71 G1TZN7 G1SV04 A0A5F9C153
	map03320 PPAR signaling pathway	5.05	0.00819396	A0A5F9D1Y2 G1SZ91 G1SRD2 A0A5F9CQA7
	up-unchange pathway
	map04666 Fc gamma R-mediated phagocytosis	6.01	0.00422579	G1T7T8 G1SS57 G1SJX0 A0A5F9DW46
	map04140 Autophagy	5.73	0.00499277	G1SV24 G1TLR2 U3KPC1 A0A5F9DW46
	map01521 EGFR tyrosine kinase inhibitor resistance	7.08	0.00860255	G1TLR2 G1TC42 A0A5F9DW46
	map04210 Apoptosis	4.97	0.0220886	G1SV24 U3KMG3 A0A5F9DW46
	map04015 Rap1 signaling pathway	3.31	0.0163234	G1SKJ3 G1TQW5 G1TLR2 G1SKF1 A0A5F9DW46
	unchange-down pathway
	map04610 Complement and coagulation cascades	7.53	0.00727403	G1U6C9 G1T1B8 G1TDP0
	unchange-up pathway
	map03030 DNA replication	15.43	0.00742567	A0A5F9DD21 G1SW46

## Sheet: E515-Bb vs. Alum-Bb
Contrasts	Terms	Fold enrichment	p value	Related proteins
	(Proteome-Transcriptome)
E515-Bb vs. Alum-Bb	up-unchange pathway
	map04662 B cell receptor signaling pathway	8.63	0.0217054	G1SEU8 G1SR32
	map01100 Metabolic pathways	2.26	0.0329407	G1T7L5 G1T0V6 G1SWV6 G1T233 G1SE67 G1TY06
	unchange-down pathway
	map04512 ECM-receptor interaction	14.45	4.67915e-12	G1U9R7 A0A5F9D0T9 G1SJE1 G1TN89 A0A5F9DIW0 A0A5F9CEG8 G1ST52 A0A5F9CTL5 A0A5F9CI63 A0A5F9CNP8 A0A5F9DRG5 G1U334 A0A5F9CXB0
	map03030 DNA replication	16.68	1.23533e-05	G1SJE3 A0A5F9CI26 G1SZQ1 G1SD05 G1SLF6
	map04151 PI3K-Akt signaling pathway	3.17	0.000346717	G1U9R7 A0A5F9D0T9 G1SJE1 A0A5F9DIW0 A0A5F9CEG8 G1ST52 A0A5F9CTL5 A0A5F9CI63 A0A5F9DRG5 G1U334 A0A5F9CXB0 G1T0K2
	map04115 p53 signaling pathway	6.25	0.00386741	G1SIH0 G1SRD0 G1SPQ7 G1T0K2
	unchange-up pathway
	map04672 Intestinal immune network for IgA production	8.5	0.00499055	A0A5F9C686 U3KLX1 G1SKP7
	map04514 Cell adhesion molecules (CAMs)	5.6	0.0155696	A0A5F9C686 U3KLX1 G1SKP7
	map04612 Antigen processing and presentation	6.91	0.033415	A0A5F9C686 U3KLX1
	map04658 Th1 and Th2 cell differentiation	5.84	0.0454313	A0A5F9C686 U3KLX1
